# Supplementary material for: Identification and expression pattern of chemosensory genes in the transcriptome of Propsilocerus akamusi
Source: PeerJ. 2020 Jul 21;8:e9584. doi: 10.7717/peerj.9584 (PMC7380273; doi:10.7717/peerj.9584)
Supplement: Supplemental Information 2 [file peerj-08-9584-s002.xlsx]

## Sheet: Sheet1
choice of female							choice of male
	female	None	Not					Left	Right	No
1	11	6	3	17			1	1	2	17	3
2	12	8	0	20			2	2	2	16	4
3	9	9	2	18			3	2	4	14	6
4	10	9	1	19			4	0	1	19	1
5	14	6	0	20			5	0	2	18	2
6	13	7	0	20			6	3	0	17	3
7	13	6	1	19			7	3	3	14	6
8	11	8	1	19			8	1	2	17	3
9	12	8	0	20			9	2	3	15	5
	Left	Right	No					Left	Right	No
1	0.55	0.3	0.15				1	0.05	0.1	0.85
2	0.6	0.4	0				2	0.1	0.1	0.8
3	0.45	0.45	0.1				3	0.1	0.2	0.7
4	0.5	0.45	0.05				4	0	0.05	0.95
5	0.7	0.3	0				5	0	0.1	0.9
6	0.65	0.35	0				6	0.15	0	0.85
7	0.65	0.3	0.05				7	0.15	0.15	0.7
8	0.55	0.4	0.05				8	0.05	0.1	0.85
9	0.6	0.4	0				9	0.1	0.15	0.75
average value	0.583333	0.372222	0.0444444				average value	0.0777778	0.105556	0.816667
Standard error	0.0790569	0.0618017	0.0527046				Standard error	0.0565194	0.0583333	0.0866025
	Attract	avoid						Attract	avoid
1	0.647059	0.352941					1	0.333333	0.666667
2	0.6	0.4					2	0.5	0.5
3	0.5	0.5					3	0.333333	0.666667
4	0.526316	0.473684					4	0	1
5	0.7	0.3					5	0	1
6	0.65	0.35					6	1	0
7	0.684211	0.315789					7	0.5	0.5
8	0.578947	0.421053					8	0.333333	0.666667
9	0.6	0.4					9	0.4	0.6
average value	0.609615	0.390385					average value	0.377778	0.622222
Standard error	0.0678662	0.0678662					Standard error	0.297676	0.297676
	Left	Right	No					Left	Right	No
1	32	23	5				1	5	8	47
2	37	22	1				2	3	3	54
3	36	22	2				3	6	8	46
	Left	Right	No					Left	Right	No
1	0.533333	0.383333	0.0833333				1	0.0833333	0.133333	0.783333
2	0.616667	0.366667	0.0166667				2	0.05	0.05	0.9
3	0.6	0.366667	0.0333333				3	0.1	0.133333	0.766667
average value	0.583333	0.372222	0.0444444				average value	0.0777778	0.105556	0.816667
Standard error	0.0440959	0.0096225	0.0346944				Standard error	0.0254588	0.0481125	0.0726483
	0.583333	0.0440959						0.0777778	0.0254588
	0.372222	0.0096225						0.105556	0.0481125
	0.0444444	0.0346944						0.816667	0.0726483
	58.3333	4.40959						7.77778	2.54588
	37.2222	0.96225						10.5556	4.81125
	4.44444	3.46944						81.6667	7.26483
	1	0.533333	0.0833333
	1	0.616667	0.05
	1	0.6	0.1
	2	0.383333	0.133333
	2	0.366667	0.05
	2	0.366667	0.133333
	3	0.0833333	0.783333
	3	0.0166667	0.9
	3	0.0333333	0.766667
