# Supplementary material for: Identification and expression pattern of chemosensory genes in the transcriptome of Propsilocerus akamusi
Source: PeerJ. 2020 Jul 21;8:e9584. doi: 10.7717/peerj.9584 (PMC7380273; doi:10.7717/peerj.9584)
Supplement: Supplemental Information 4 [file peerj-08-9584-s004.xlsx]

## Sheet: fig.6
OBP1	2-ΔΔCt	2-ΔΔCt	2-ΔΔCt	OBP1	average value	Standard error
AN	57.8352	58.4852	67.1717	AN	61.164	5.21294	a
HE	3.38698	4.59479	4.50217	HE	4.16131	0.672189	b
LE	53.8174	56.493	63.1189	LE	57.8098	4.78853	a
OBP2	2-ΔΔCt	2-ΔΔCt	2-ΔΔCt	OBP2	average value	Standard error
AN	1	1	1	AN	1	0	c
HE	1.72907	2.44528	2.31	HE	2.16145	0.38051	b
LE	10.9283	11.1579	11.06	LE	11.0488	0.115226	a
OBP3	2-ΔΔCt	2-ΔΔCt	2-ΔΔCt	OBP3	average value	Standard error
AN	7.51618	5.65685	6.58689	AN	6.58664	0.929664	b
HE	3.65533	2.71321	3.68075	HE	3.34976	0.551418	b
LE	73.0089	89.2636	89.8845	LE	84.0523	9.56893	a
OBP4	2-ΔΔCt	2-ΔΔCt	2-ΔΔCt	OBP4	average value	Standard error
AN	0.835088	1	1.13288	AN	0.989324	0.149185	b
HE	1	1	1	HE	1	0	b
LE	8.22491	10.6295	9.22	LE	9.35813	1.20822	a
OBP5	2-ΔΔCt	2-ΔΔCt	2-ΔΔCt	OBP5	average value	Standard error
AN	9.06307	9.78112	12.2101	AN	10.3514	1.64919	a
HE	0.171943	0.142595		HE	0.157269	0.0207516	b
LE	1	1	1	LE	1	0	b
OBP6	2-ΔΔCt	2-ΔΔCt	2-ΔΔCt	OBP6	average value	Standard error
AN	1	1	1	AN	1	0	c
HE	16.1113	16.7955	17.1484	HE	16.685	0.527288	b
LE	20.1122	22.6274	23.1029	LE	21.9475	1.60708	a
OBP7	2-ΔΔCt	2-ΔΔCt	2-ΔΔCt	OBP7	average value	Standard error
AN	1	1	1	AN	1	0	c
HE	16.4498	16.6795	17.1484	HE	16.7592	0.356042	a
LE	13.0864	13.5479	16.1113	LE	14.2485	1.6296	b
OBP8	2-ΔΔCt	2-ΔΔCt	2-ΔΔCt	OBP8	average value	Standard error
AN	10.4831	11.9588	12.295	AN	11.579	0.963793	a
HE	5.65685	6.6807	7.4127	HE	6.58342	0.881958	b
LE	1	1	1	LE	1	0	c
OBP9	2-ΔΔCt	2-ΔΔCt	2-ΔΔCt	OBP9	average value	Standard error
AN	1	1	1	AN	1	0	a
HE	No amplification			HE
LE	No amplification			LE
OBP10	2-ΔΔCt	2-ΔΔCt	2-ΔΔCt	OBP10	average value	Standard error	2-ΔΔCt
AN	9.91766	10.1965	10.6295	AN	10.2479	0.358685	a
HE	3.63008	4.46915	4.92458	HE	4.34127	0.656657	b
LE	1	1	1	LE	1	0	c
thoraxes
OBP11	2-ΔΔCt	2-ΔΔCt	2-ΔΔCt	OBP11	average value	Standard error
AN	1	1	1	AN	1	0	c
HE	15.1369	15.3482	17.5087	HE	15.9979	1.31261	a
LE	2.65737	3.34035	3.78423	LE	3.26065	0.567642	b
OBP12	2-ΔΔCt	2-ΔΔCt	2-ΔΔCt	OBP12	2-ΔΔCt	2-ΔΔCt
AN	1	1	1	AN	1	0	b
HE	18.6357	19.0273	23.2636	HE	20.3089	2.56632	a
LE	22.1618	24.2515	26.9087	LE	24.4406	2.37911	a

## Sheet: fig.7
OR1	2-ΔΔCt	2-ΔΔCt	2-ΔΔCt	OR1	average value	Standard error
AN	29.8571	31.125	34.7755	AN	31.9192	2.55361	a
HE	2.75108	2.94854	3.09513	HE	2.93158	0.172649	b
LE	1	1	1	LE	1	0	b
OR2	2-ΔΔCt	2-ΔΔCt	2-ΔΔCt	OR2	average value	Standard error
AN	15.3482	17.0299	19.6983	AN	17.3588	2.19361	a
HE	1	1	1	HE	1	0	c
LE	5.24157	5.35171	6.32033	LE	5.63787	0.593587	b
OR3	2-ΔΔCt	2-ΔΔCt	2-ΔΔCt	OR3	average value	Standard error
AN	16.5642	18.6357	19.9733	AN	18.3911	1.71764	a
HE	21.8566	17.5087	18.507	HE	19.2908	2.27747	a
LE	1	1	1	LE	1	0	b
OR4	2-ΔΔCt	2-ΔΔCt	2-ΔΔCt	OR4	average value	Standard error
AN	No amplification			AN
HE	1	1	1	HE	1	0	a
LE	No amplification			LE
OR5	2-ΔΔCt	2-ΔΔCt	2-ΔΔCt	OR5	average value	Standard error
AN	15.2422	10.1261	21.7057	AN	15.6913	5.80286	b
HE	25.8125	36.5044	27.6652	HE	29.9941	5.71375	a
LE	1	1	1	LE	1	0	c
OR6	2-ΔΔCt	2-ΔΔCt	2-ΔΔCt	OR6	average value	Standard error
AN	3.21017	3.16017	3.34035	AN	3.23689	0.0930194	a
HE	1	1	1	HE	1	0	b
LE	No amplification			LE

## Sheet: fig.8
GR1	2-ΔΔCt	2-ΔΔCt	2-ΔΔCt	GR1	average value	Standard error
AN	33.9353	36.5044	35.8104	AN	35.4167	1.32905	a
HE	1	1	1	HE	1	0	b
LE	0.239661	0.231647	0.343885	LE	0.271731	0.0626158	b
GR2	2-ΔΔCt	2-ΔΔCt	2-ΔΔCt	GR2	average value	Standard error
AN	6.7963	8.06536	7.31536	AN	7.39234	0.638025	a
HE	3.09943	3.5822	3.22142	HE	3.30102	0.251034	b
LE	4.62675	5.06303	5.20537	LE	4.96505	0.301494	c
GR3	2-ΔΔCt	2-ΔΔCt	2-ΔΔCt	GR3	average value	Standard error
AN	102.153	185.072	115.237	AN	134.154	44.5789	b
HE	18.3792	20.393	19.2357	HE	19.3359	1.01063	b
LE	1394.75	1602.89	1523.13	LE	1506.92	105.012	a
GR4	2-ΔΔCt	2-ΔΔCt	2-ΔΔCt	GR4	average value	Standard error
AN	0.496546	0.528509	0.641713	AN	0.555589	0.0762781	c
HE	13.5479	14.1232	15.0324	HE	14.2345	0.748448	a
LE	2.25012	3.5801	3.70635	LE	3.17886	0.806785	b
GR5	2-ΔΔCt	2-ΔΔCt	2-ΔΔCt	GR5	average value	Standard error
AN	0.0896222	0.143587	0.103043	AN	0.112084	0.0280957	b
HE	28.2465	31.5594	35.0174	HE	31.6078	3.38571	a
LE	24.723	34.2968	30.9143	LE	29.978	4.85507	a
GR6	2-ΔΔCt	2-ΔΔCt	2-ΔΔCt	GR6	average value	Standard error
AN	1	1	1	AN	1	0	c
HE	9.91356	12.6805	9.05614	HE	10.5501	1.89417	b
LE	39.1245	32.4467	31.2563	LE	34.2758	4.24103	a
GR7	2-ΔΔCt	2-ΔΔCt	2-ΔΔCt	GR7	average value	Standard error
AN	1	1	1	AN	1	0	c
HE	7.20322	4.49915	4.82356	HE	5.50864	1.47648	b
LE	10.5561	9.25351	8.99659	LE	9.60205	0.836122	a
GR8	2-ΔΔCt	2-ΔΔCt	2-ΔΔCt	GR8	average value	Standard error
AN	No amplification			AN			c
HE	1.69349	1.71541	1.39474	HE	1.60121	0.179143	a
LE	1	1	1	LE	1	0	b
GR9	2-ΔΔCt	2-ΔΔCt	2-ΔΔCt	GR9	average value	Standard error
AN	1	1	1	AN	1	0	c
HE	15.6357	12.1561	24.6342	HE	17.4753	6.43928	b
LE	31.6508	25.59	25.3266	LE	27.5225	3.57768	a
GR10	2-ΔΔCt	2-ΔΔCt	2-ΔΔCt	GR10	average value	Standard error
AN	1	1	1	AN	1	0	b
HE	2.11404	2.20381	2.21914	HE	2.179	0.0567758	b
LE	6.33456	4.11246	4.95685	LE	5.13462	1.12167	a

## Sheet: fig.9
IR1	2-ΔΔCt	2-ΔΔCt	2-ΔΔCt	IR1	average value	Standard error
AN	2.26577	2.2974	2.84355	AN	2.4689	0.324836	ab
HE	4.46915	3.5801	4.95883	HE	4.33603	0.698939	ab
LE	1	1	1	LE	1	0	b
IR2	2-ΔΔCt	2-ΔΔCt	2-ΔΔCt	IR2	average value	Standard error
AN	1	1	1	AN	1	0	b
HE	0.624165	0.632878	0.598739	HE	0.618594	0.0177382	b
LE	9.64646	9.91766	11.8762	LE	10.4801	1.21662	a
IR3	2-ΔΔCt	2-ΔΔCt	2-ΔΔCt	IR3	average value	Standard error
AN	1	1	1	AN	1	0	c
HE	15.3482	15.1369	14.723	HE	15.0694	0.318037	a
LE	7.31065	8.45614	7.21285	LE	7.65988	0.691316	b
IR4	2-ΔΔCt	2-ΔΔCt	2-ΔΔCt	IR4	average value	Standard error
AN	1	1	1	AN	1	0	b
HE	9.64646	7.31065	9.25351	HE	8.73687	1.25067	a
LE	8.1681	8.51496	9.51366	LE	8.73224	0.698598	a
IR5	2-ΔΔCt	2-ΔΔCt	2-ΔΔCt	IR5	average value	Standard error
AN	1	1	1	AN	1	0	c
HE	16	16.7955	20.2521	HE	17.6825	2.26059	b
LE	96.3358	98.36	122.786	LE	105.827	14.7214	a
IR6	2-ΔΔCt	2-ΔΔCt	2-ΔΔCt	IR6	average value	Standard error
AN	1	1	1	AN	1	0	b
HE	1.67018	2.11404	2.21914	HE	2.00112	0.291381	b
LE	99.0442	101.125	101.125	LE	100.432	1.20154	a
IR7	2-ΔΔCt	2-ΔΔCt	2-ΔΔCt	IR7	average value	Standard error
AN	1	1	1	AN	1	0	c
HE	9.64646	10.1261	15.455	HE	11.7425	3.22403	b
LE	69.0706	72.5046	74.028	LE	71.8677	2.53933	a
IR8	2-ΔΔCt	2-ΔΔCt	2-ΔΔCt	IR8	average value	Standard error
AN	1	1	1	AN	1	0	c
HE	6.19026	7.11074	7.46426	HE	6.92176	0.657692	a
LE	3.24901	3.29436	3.31728	LE	3.28688	0.0347436	b
IR9	2-ΔΔCt	2-ΔΔCt	2-ΔΔCt	IR9	average value	Standard error
AN	1	1	1	AN	1	0	c
HE	20.393	23.1029	25.2813	HE	22.9257	2.44899	b
LE	51.2685	53.0765	59.7141	LE	54.6863	4.44702	a
IR10	2-ΔΔCt	2-ΔΔCt	2-ΔΔCt	IR10	average value	Standard error
AN	1	1	1	AN	1	0	c
HE	8.1681	13.0864	13.3614	HE	11.5386	2.92222	a
LE	3.65533	3.75809	3.83706	LE	3.75016	0.0911247	b
IR11	2-ΔΔCt	2-ΔΔCt	2-ΔΔCt	IR11	average value	Standard error
AN	1	1	1	AN	1	0	c
HE	32.4467	33.8246	32.1256	HE	32.799	0.902586	a
LE	2.69447	3.03143	3.09513	LE	2.94034	0.215304	b
IR12	2-ΔΔCt	2-ΔΔCt	2-ΔΔCt	IR12	average value	Standard error
AN	1	1	1	AN	1	0	c
HE	7.94474	8.28212	9.00047	HE	8.40911	0.539199	b
LE	15.3482	16.9123	17.2677	LE	16.5094	1.02117	a
IR13	2-ΔΔCt	2-ΔΔCt	2-ΔΔCt	IR13	average value	Standard error
AN	1	1	1	AN	1	0	c
HE	22.0087	23.4254	25.8125	HE	23.7489	1.92246	a
LE	4.19887	4.25748	4.78991	LE	4.41542	0.325643	b
IR14	2-ΔΔCt	2-ΔΔCt	2-ΔΔCt	IR14	average value	Standard error
AN	1	1	1	AN	1	0	b
HE	4.37717	4.40762	4.46915	HE	4.41798	0.0468541	a
LE	0.397768	0.406126	0.493116	LE	0.432337	0.0528022	c
IR15	2-ΔΔCt	2-ΔΔCt	2-ΔΔCt	IR15	average value	Standard error
AN	1	1	1	AN	1	0	b
HE	8.63383	10.4107	13.4543	HE	10.833	2.43784	a
LE	1.67018	1.87905	1.95884	LE	1.83602	0.149064	b
IR16	2-ΔΔCt	2-ΔΔCt	2-ΔΔCt	IR16	average value	Standard error
AN	1	1	1	AN	1	0	b
HE	4.69134	4.75683	5.73582	HE	5.06133	0.585044	a
LE	0.219151	0.233258	0.257028	LE	0.236479	0.0191429	c

## Sheet: fig.10
CSP1	2-ΔΔCt	2-ΔΔCt	2-ΔΔCt	CSP1	average value	Standard error
AN	4.75683	4.82323	4.79013	AN	4.79006	0.0332015	b
HE	3.01049	3.11666	3.29436	HE	3.14051	0.14343	c
LE	5.16941	5.24157	5.27803	LE	5.22967	0.0552795	a
SNMP1	2-ΔΔCt	2-ΔΔCt	2-ΔΔCt	SNMP1	average value	Standard error
AN	5.81589	9.63882	6.15313	AN	7.20262	2.11654	b
HE	0.246558	0.236514	0.223756	HE	0.23561	0.0114278	c
LE	16.0522	15.7895	21.7057	LE	17.8491	3.34245	a
